# The *Drosophila* Dpit47 protein is a nuclear Hsp90 co-chaperone that interacts with DNA polymerase $\alpha$

Gilles Crevel<sup>‡</sup>, Helen Bates<sup>‡</sup>, Hella Huikeshoven and Sue Cotterill<sup>\*</sup>

Department of Biochemistry and Immunology, St Georges Hospital Medical School, Cranmer Terrace, London, SW17 0RE, UK

<sup>‡</sup>These authors contributed equally to this paper

<sup>\*</sup>Author for correspondence (e-mail: s.cotterill@sghms.ac.uk)

Accepted 10 March 2001

Journal of Cell Science 114, 2015-2025 (2001) © The Company of Biologists Ltd

## SUMMARY

Hsp90 is gaining increasing importance as a protein involved in controlling the normal functioning of the cell. To do this it apparently interacts with a battery of co-chaperone proteins that are involved in both substrate recognition and the progression of the Hsp90 catalytic pathway. In this report we have identified the *Drosophila* Dpit47 protein (DNA polymerase interacting protein containing protein of 47 kDa) through its interaction with the DNA polymerase  $\alpha$ . This protein is a predominantly nuclear protein, which forms a tight and stoichiometric interaction with Hsp90 and shows interaction with Hsp70. It also has substantial homology to other known Hsp90 co-chaperones, e.g. CNS1 and hop1, making it likely that this protein also functions as an Hsp90 co-chaperone.

The interaction with the DNA polymerase  $\alpha$  is not related to the special situation in early embryos where there are large amounts of maternal protein stockpiles of the polymerase, as it occurs to the same level in early and late embryos and also in proliferating cell culture. However, it does not occur in quiescent cells, making it likely that the protein is related to proliferation. This is also consistent

with Dpit47 expression being higher in proliferating cells. The interaction between the Dpit47 and the polymerase takes place predominantly in the nucleoplasm, and seems to involve several subunits of the polymerase in comparable amounts, making it unlikely that it is solely required for the assembly of the polymerase complex. The polymerase can also be seen to interact with Hsp90, and the interaction between Dpit47 and the polymerase is increased by the specific Hsp90 inhibitor geldanamycin. This suggests that a complex of the Dpit47, Hsp90 and DNA polymerase exists in the cell. The interaction between DNA polymerase  $\alpha$  and Dpit47 completely inhibits the activity of the polymerase.

These results suggest that Hsp90 acts as a chaperone for DNA polymerase  $\alpha$  and that this interaction is mediated through the novel co-chaperone Dpit47. This provides the first suggestion of a role for chaperones in DNA replication in higher eukaryotes.

Key words: Replication, Heat shock proteins, DNA polymerase, *Drosophila*, Chaperone

## INTRODUCTION

Heat shock proteins have traditionally been studied as factors that help proteins recover from high temperature or other stresses (Parsell and Lindquist, 1993). Hsp90 was first isolated by this route but in the last few years it has become apparent that this particular heat shock protein may have a more specialised role, and may be involved in controlling normal cellular functioning (in the absence of stress) of a variety of different proteins. The best studied of these is the glucocorticoid receptor, but Hsp90 activity has also been implicated in the control of a number of other proteins including a number of kinases (e.g. src; Buchner, 1999; Xu et al., 1999), cyclin D (Mahony et al., 1998) and telomerase (Holt et al., 1999). The effect of the Hsp90:substrate interaction varies; e.g. for src it is needed to direct phosphorylation of the kinase, whereas for the glucocorticoid receptor it is needed directly to allow the interaction with hormone. How Hsp90 achieves this in each case is not yet clear; however, its full activity seems to require collaboration with a number of co-chaperone molecules. These are involved both in stimulating Hsp90 activity and providing specificity for the substrate

(Buchner, 1999), and the Hsp90 pathway involves the formation of a number of dynamic complexes between the Hsp90, the co-chaperones and the client molecule. In this paper we provide evidence that the DNA polymerase  $\alpha$  from *Drosophila melanogaster* appears to participate in such complexes and therefore falls into the ever-growing category of proteins controlled by Hsp90.

DNA polymerases are essential enzymes involved in DNA replication and in repair. Although at least nine different polymerases have now been isolated from eukaryotes (Hubscher et al., 2000) only one of these – the DNA polymerase  $\alpha$ , contains a DNA primase activity. Therefore, DNA polymerase  $\alpha$  is the only known DNA polymerase able to initiate de novo DNA synthesis (Foiani et al., 1997) and is required for both initiation at chromosomal origins and for the synthesis of Okasaki fragments on the lagging strand. In all species so far studied, the DNA polymerase  $\alpha$  is composed of four subunits. The polymerase activity is associated with the largest (~180 kDa) subunit, whereas the primase activity is associated with the smallest (~50 kDa) (Bakkenist and Cotterill, 1994; Copeland and Wang, 1993; Nasheuer and Grosse, 1988; Santocanale et al., 1993). Little is known about

the activities associated with the other subunits (~60 and ~80 kDa). For efficient initiation of replication, DNA polymerase  $\alpha$  has to be loaded and active at specific points during the cell cycle; it also has to be prevented from inappropriate DNA synthesis. How this regulation is achieved is not yet clear, but extensive study in a number of organisms has indicated that it is liable to be at a number of different levels. Although the rate of transcription is cell-cycle controlled in budding yeast, protein levels remain constant throughout the cell cycle (Falconi et al., 1993). Differential association of the polymerase with the chromatin has been observed in budding yeast (Desdouets et al., 1998), human cell culture (Stokke et al., 1991) and *Drosophila* embryos (Melov et al., 1992). Phosphorylation may also be involved as phosphorylation of various subunits has been observed in vivo for budding yeast (Foiani et al., 1995), fission yeast (Bouvier et al., 1993), humans (Nasheuer and Grosse, 1988) and *Drosophila* (Kuroda and Ueda, 1999), and in vitro a number of kinases have been shown to phosphorylate the enzyme, in some cases having effects on the polymerase activity of the enzyme (Voitenleitner et al., 1999) (Weinreich and Stillman, 1999).

In an effort to understand more about the mechanisms controlling the DNA polymerase  $\alpha$  from *Drosophila melanogaster*, we have cloned and characterised all four subunits of the complex (Bakkenist and Cotterill, 1994; Cotterill et al., 1992; Huikeshoven and Cotterill, 1999; Melov et al., 1992) and carried out screens to identify interacting proteins. In this paper we present our data on one of the proteins that we isolated by two-hybrid interaction with the p180 subunit. This protein, which we have called Dpit47, appears to be an Hsp90 co-chaperone protein. We present our analysis of the characterisation of Dpit47 and its interaction with Hsp90. We also present data on the interaction of DNA polymerase  $\alpha$  with Dpit47 and Hsp90. Complexes of DNA polymerase  $\alpha$  with Dpit47 show severely suppressed polymerase activity in vitro. This interaction with Hsp90 could therefore provide an additional level of control for the polymerase. An effect of heat shock proteins is already well documented in a number of prokaryotic DNA replication systems (Konieczny and Zylicz, 1999), and is also thought to be involved in the control of replication of some eukaryotic viruses, e.g. SV40 (Campbell et al., 1997) and papilloma (Liu et al., 1998), but we believe this constitutes the first evidence that Hsp90 may have a function in DNA replication in higher eukaryotes.

## MATERIALS AND METHODS

### Cloning and sequencing

Yeast two-hybrid screening was carried out as described (Gyuris et al., 1993; Zervos et al., 1993). Roger Brent kindly provided the yeast strain EGY48, the lacZ reporter plasmid (pSH18-34), the LexA fusion control plasmid (RFHM1) and the plasmid library (*Drosophila* ovarian cDNA in pJG4-5 – RFLY3). The plasmid used to make the LexA fusion bait was based on pRS313 and pV44ER-LEX. The SacI-KpnI fragment of pV44ER-LEX containing the galactose inducible LexA protein and a multiple cloning site was ligated into SacI-KpnI cut pRS313 in order to change the selectable marker from Trp to His. The *Drosophila* DNA polymerase  $\alpha$  p180 subunit-coding region was then cloned in frame with the LexA protein.

DNA sequencing was carried out using the Sequenase kit (US

Biochemicals, Cleveland, OH, USA) or was sent to Advanced Biotechnology Centre, Charing Cross and Westminster Medical School, for ABI sequencing. Nucleotide sequence analysis and amino acid comparisons were performed using Geneworks (IntelliGenetics Inc.) or the Blast facility at NIH.

### Production of Dpit47 antibodies

Dpit47 missing the first 20 amino acids was cloned into pQE31 (Qiagen) and the His-tagged protein expressed and purified according to the manufacturer's instructions. Purified protein was sent to Neosystem laboratoire (Strasbourg) for antibody production in two rabbits. The polyclonal antisera of these rabbits were affinity purified using purified Dpit47 cross-linked onto CNBr activated sepharose 4B (Amersham-Pharmacia) using standard procedures (Harlow and Lane, 1988).

### Immunoprecipitations

Antibodies were cross-linked to protein A-sepharose beads using dimethylpimelimidate. 50  $\mu$ l of packed beads were incubated for 1 hour at 4°C with 300  $\mu$ l of extract. Beads were then washed ten times with 20 volumes of IP buffer: 10 mM Tris, pH 7.5, 100 mM NaCl, 0.05% triton X100 and 5% glycerol buffer (1 ml per wash). The beads were then incubated with 100  $\mu$ l of IP buffer plus 250 mM NaCl. This eluate was kept and the beads washed ten times with IP buffer plus 250 mM NaCl. This treatment was repeated with 500 mM NaCl, the beads were incubated with 2% SDS and the pellet was resuspended in 100  $\mu$ l SDS-PAGE loading buffer. For the experiment with the addition of geldanamycin or ATP, MgCl<sub>2</sub> was added to a final concentration of 1 mM and geldanamycin added at 3  $\mu$ g/ml or ATP at 1 mM, final concentration.

### Calculation of Dpit47 concentration in extracts

Dpit47 was immunoprecipitated from *Drosophila* embryo crude extract, as indicated above, so that it could be visualised on PAGE-SDS upon staining with sensitive Coomassie (Brilliant blue G colloidal) (e.g. Fig. 3; Fig. 4; Fig. 6b). The concentration of Dpit47 in the immunoprecipitate was estimated by comparison with known amounts of molecular weight markers. The immunoprecipitated Dpit47 was then used as a standard to estimate the amount of the protein in crude extracts by western blotting. In all cases, serial dilutions were loaded on the gels and the amounts estimated using the Alpha Innotech Corporation quantitation program.

### Immunocytochemistry and confocal microscopy

Embryos were harvested, dechorionated in hypochlorite and rinsed in PBS, 0.1% triton X-100, and then fixed and stained essentially according to (Ashburner, 1989), except that fluorescent detection was used. Prior to hybridisation, embryos were blocked in PBS, 0.1% triton and 2% BSA for 1 hour. Primary antibodies (anti Dpit47 affinity purified) were added at a concentration of 1/500 in PBS, 0.1% triton and 2% BSA, and incubated at 4°C overnight. After washing in PBS plus 0.1% triton X-100, secondary antibody (FITC conjugated goat anti-rabbit, from Vectorlabs) was added at a concentration of 1/500 in PBS plus 0.1% tween-20 for 1 hour and the embryos washed in PBS, 0.1% tween-20.

Embryos were counterstained with monoclonal anti-histones (1/1000, Chemicon) and horse anti-mouse Texas red monoclonal (1/500, Vectorlabs) following a similar procedure.

### *Drosophila* embryos, cell extracts and cellular fractionation

For whole cell extract, *Drosophila* embryos of the ages indicated in the text were homogenised in 1 volume of IP buffer using a Dounce homogeniser with a tight pestle in order to break open the nuclei. These were filtered through Miracloth and then centrifuged for 5 minutes at 6.5 K rpm in a microfuge.

For cellular fractionation the homogenisation was carried out using

a loose pestle in order to maintain the integrity of the nuclei. The filtered homogenate was centrifuged for 10 minutes at 13 K rpm. The supernatant is the cytoplasmic fraction. The nuclei pellet was washed several times using the same buffer and subjected to further fractionation, first using 1% Triton X100 and then increasing the NaCl concentration as indicated in the text. In each case the first supernatant was kept and the pellet washed several times with buffer supplemented with Triton and/or NaCl. All buffers were supplemented with protease inhibitors (Boehringer Mannheim, Complete™, EDTA free).

Cell culture S2 cells were propagated in 1X Schneider's *Drosophila* media (GIBCO) supplemented with 10% FBS, 50 units/ml penicillin and 50 µg/ml streptomycin. Cells either in exponentially growing phase or in stationary phase were harvested and treated as above for whole cell extracts or cellular fractionation.

**DNA polymerase assay**

A 35 bp oligonucleotide (TGAGTCGTATTACAATTCCTGGC-CGTCGTTTTAC) was annealed to a complementary 17 bp oligonucleotide (GTAAAACGACGGCCAGT). For each reaction 2.5 pmol of annealed primers were used. The reaction was carried out at 25°C in a final volume of 50 µl of 20 mM Tris-HCl, pH 8, 2 mM DTT, 200 µg/ml bovine serum albumin, 10 mM MgCl<sub>2</sub>, 50 µM dATP, 50 µM dGTP, 50 µM dTTP and <sup>32</sup>PαdCTP. The reaction was stopped by the addition of 10 µl EDTA (0.5 M) and 5 µl SDS 20%. The free nucleotides were removed on a G50 spin column. The products of the reaction were ethanol precipitated and analysed on a 15% polyacrylamide gel. The bands were visualised either by autoradiography or using a phosphorimager screen.

**RESULTS**

**Dpit47 is a novel polymerase α interacting protein**

Dpit47 was originally isolated using the two hybrid screen, with the 180 kDa subunit of the *Drosophila* DNA polymerase α as a bait. The predicted amino acid sequence of the protein (396 aa; predicted molecular weight 46.5 kDa) is shown in Fig. 1. The only distinguishable features in the Dpit47 sequence is a domain between positions 88 and 193 containing three TPR motifs (tetra-trico peptide repeat). TPR motifs are highly degenerate 34 amino acid repeats thought to be involved in protein:protein interactions (Lamb et al., 1995), and are found in proteins with a wide range of functions such as cell cycle control, transcription and splicing, protein transport, regulatory phosphate turnover and protein folding.

Searching of databases revealed that Dpit47 had homology both in the TPR motifs and in the surrounding sequence to

the yeast CNS1 protein. CNS1 was isolated as a high-copy-number suppressor of the *cpr7* slow-growth phenotype and it has been suggested to be an Hsp90 co-chaperone (Dolinski et al., 1998; Marsh et al., 1998). The closest homologue on the database, however, was a human protein called TTC4 (Su et al., 1999), which is in a region of the genome often deleted in breast cancer. The relative homology between Dpit47 and its yeast and human counterparts is shown in Fig. 1.

Database searching also revealed several other *Drosophila* proteins related to the Dpit47 protein. It therefore seems likely that Dpit47 forms part of a protein family.

Analysis of the region upstream of the Dpit47 gene did not reveal any sites for the E2F (Duronio et al., 1995) or DREF (Yamaguchi et al., 1995) transcription factors – both of which have previously been implicated in the control of genes involved in cell cycle and replication in *Drosophila*.

**Dpit47 interacts with polymerase α in crude extracts**

To analyse Dpit47 further, an antibody was raised against an overexpressed hexa-his tagged version of the protein. In crude extract from *Drosophila* embryos, affinity purified antibody recognises a single band of approximately 50 kDa (data not shown), which corresponds well to the size predicted from the sequence of 46.5 kDa. Calculation of the amount of Dpit47 in the cell suggests that it is an abundant protein and is present at approximately 2×10<sup>9</sup> molecules per cell in stage 14 embryos. (see Materials and methods).

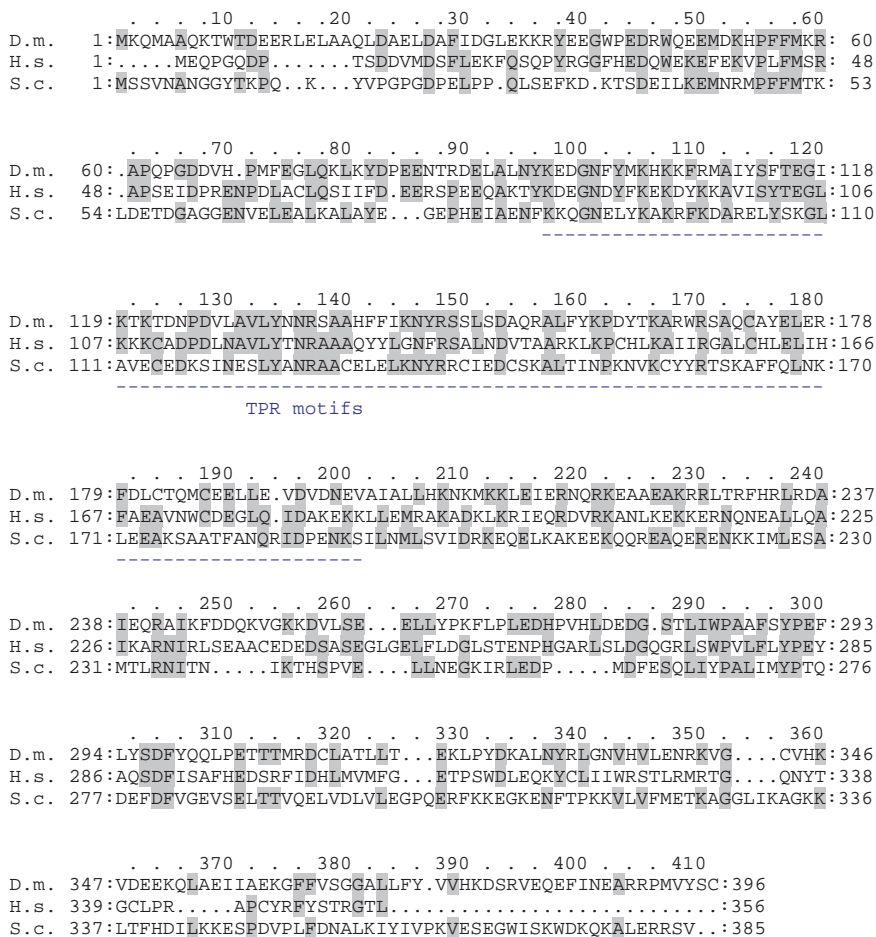

**Fig. 1.** Predicted amino acid sequence of Dpit47, human TTC4 and *S. cerevisiae* CNS1. Shaded boxes indicate regions of identity. The TPR domain region is indicated below the sequence. D.m., *Drosophila melanogaster*; H.s., *Homo sapiens*; S.c., *Saccharomyces cerevisiae*; TPR, tetra-trico peptide repeat.

**Fig. 2.** Co-immunoprecipitation of Dpit47 and DNA polymerase  $\alpha$ . *Drosophila* embryo crude extract was subjected to immunoprecipitation using a polyclonal antibody against Dpit47 cross-linked to protein A sepharose. The immunocomplexes were washed extensively and then eluted with increasing salt concentrations and SDS as indicated in the figure. The top panel represents the elution profile of DNA polymerase  $\alpha$  (pol $\alpha$ 180), and the bottom represents that of the Dpit47 in the same experiment. c, control immunoprecipitation using an unrelated antibody. 1 and 2, immunoprecipitation using anti-Dpit47 antibody (duplicate experiments are shown for each immunoprecipitate).

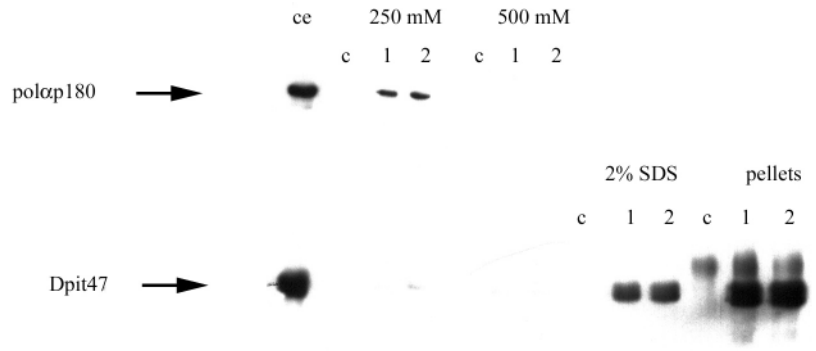

To obtain confirmation of the interaction between DNA polymerase  $\alpha$  and Dpit47, we carried out immunoprecipitations from crude 0-5 hour *Drosophila* embryo extract using the anti Dpit47 antibody. As shown in Fig. 2, Dpit47 is efficiently immunoprecipitated from embryo extract. The analysis of the eluted fractions by western blot using antibodies directed against DNA polymerase  $\alpha$  reveals the presence of the 180 kDa subunit. The interaction is of moderate strength as all of the 180 kDa subunit has been eluted by 250 mM salt, and is further confirmed by the reverse immunoprecipitation of Dpit47 by anti-polymerase  $\alpha$  antibodies (data not shown). This interaction between Dpit47 and the 180 kDa subunit of the DNA polymerase  $\alpha$  is specific, as it is not detected when pre-immune or unrelated sera are used for the immunoprecipitation. In addition, the precipitates do not contain PCNA, RPA, cdk2, topoisomerase 2 or lamin (data not shown). Calculation of the amount of the DNA polymerase  $\alpha$  associated with Dpit47 suggests that it is about 10% of total cellular polymerase.

### Dpit47 is associated in a complex with Hsp90 and Hsp70

The CNS1 protein in yeast shows a physical and functional interaction with Hsp90. The homology of Dpit47 to the Hsp90 co-chaperone CNS1 prompted us to ask whether Dpit47 also interacted with the *Drosophila* Hsp90. The interaction between Hsp90 and its co-chaperones is quite strong; we therefore analysed those proteins that remained bound in the pellets of

Dpit47 immunoprecipitates after washing with 500 mM NaCl. Fig. 3 shows the results of such an analysis where the fractions were analysed on SDS-PAGE and stained with Coomassie

**Fig. 3.** Dpit47 forms a complex with Hsp90 and Hsp70. The pellets from two independent Dpit47 immunoprecipitations that had been washed in 500 mM NaCl were analysed by electrophoresis on SDS-PAGE and staining with sensitive Coomassie (Brilliant blue G colloidal). \*, indicates the IgG heavy band. Sizes of molecular weight markers are shown to the left of the gel.

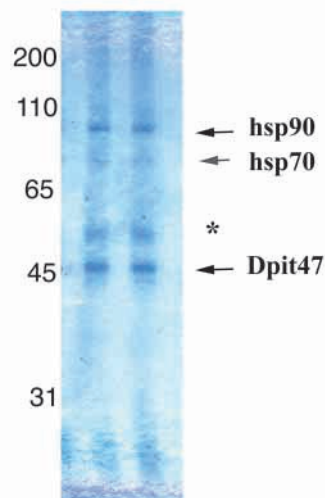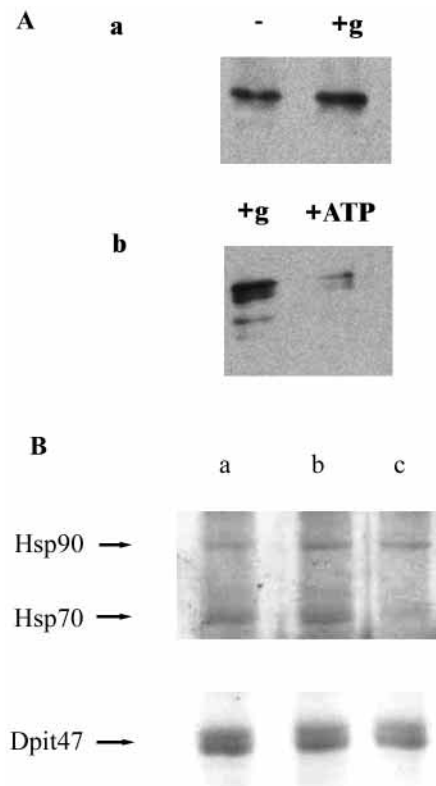

**Fig. 4.** (A) The interaction between Dpit47 and DNA polymerase  $\alpha$  is stabilised by geldanamycin (g) and destabilised by ATP. Dpit47 was immunoprecipitated from crude embryo extract with anti-Dpit47 antibody cross-linked to protein A sepharose and eluted with 250 mM NaCl as in Fig. 2. The eluates were analysed on western blots using polyclonal anti-DNA polymerase  $\alpha$  antibody. (a) Dpit47 immunoprecipitates were carried out either in the presence (+g) or absence (-) of 1  $\mu$ g/ml geldanamycin as described in materials and methods. (b) Dpit47 immunoprecipitates were carried out as above either in the presence of 1  $\mu$ g/ml geldanamycin (+g) or 1 mM ATP (+ATP). (B) The interaction between Dpit47 and Hsp70 is destabilised by ATP. The 500 mM washed pellets of the immunoprecipitation as described above were analysed on SDS-PAGE and stained with Coomassie blue. The bands corresponding to Hsp90 Hsp70 and Dpit47 are shown. a, no treatment of the immunoprecipitate; b, treatment with geldanamycin; c, treatment with ATP.

(Brilliant blue G). As shown, Dpit47 can be clearly identified and its identity confirmed by western blot using the antibody against Dpit47. Two other bands were seen in addition to Dpit47 and to the antibody bands. A band of around 85 kDa was present in near stoichiometric amount to Dpit47, and another band of around 70 kDa was visible at around 50% of the amount. These two bands were excised from the gel and analysed using MALDI-TOF. The 85 kDa band was identified as the *Drosophila* Hsp90 homologue and the 70 kDa as *Drosophila* Hsp70.

From these results we conclude that Dpit47 forms a tight complex with Hsp90 and Hsp70, and by analogy to the function of the related budding yeast protein CNS1 is likely to function as an Hsp90 co-chaperone.

### Geldanamycin stabilises the interaction between Dpit47 and DNA polymerase $\alpha$

Because Dpit47 is likely to be an Hsp90 co-chaperone we were interested to know whether we could detect an interaction of Hsp90 with DNA polymerase  $\alpha$ . Analysis of proteins immunoprecipitated with a monoclonal antibody against the DNA polymerase  $\alpha$  did show a band that cross reacted with Hsp90 antibodies (data not shown). However, in our hands the Hsp90 antibodies produced a high background; we therefore sought another way to confirm that the DNA polymerase  $\alpha$  interacted with Hsp90.

Geldanamycin is a specific inhibitor of Hsp90 activity and acts by binding to its ATP binding site (Pearl and Prodromou, 2000). The presence of geldanamycin therefore interferes with the Hsp90 pathway and has been shown to alter the interactions between the component proteins of the pathway. For DNA polymerase  $\alpha$ , direct measurement of the

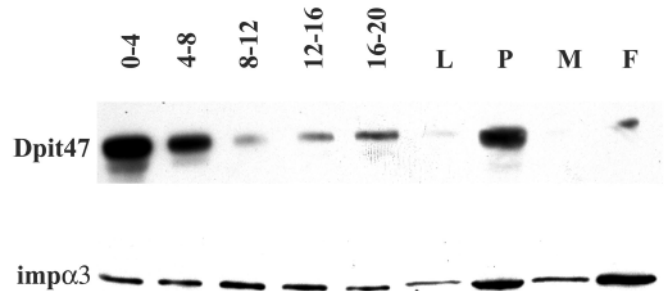

**Fig. 5.** Western blots show the abundance of Dpit47 throughout the developmental stages. Embryonic development is represented by the indicated age of embryos from 0 to 20 hours of development. L, larvae; P, pupae; M, males; F, females. Equal loading of samples was confirmed using a *Drosophila* anti-importin alpha-3 antibody (*impα3*) (Mathe et al., 2000).

interaction with Hsp90 under various conditions was limited by the quality of the Hsp90 antibodies. We therefore decided to look for an effect of geldanamycin on the interaction between Dpit47 and DNA polymerase  $\alpha$ . An observed effect should allow us to argue for an involvement of Hsp90 with the DNA polymerase  $\alpha$ , mediated through Dpit47. DNA polymerase  $\alpha$  complexed with Dpit47 was therefore isolated by immunoprecipitation in the presence or absence of geldanamycin. As can be seen in Fig. 4A,a, immunoprecipitations incubated with geldanamycin consistently contain more DNA polymerase  $\alpha$  (about twofold) than is detected in the control.

Although geldanamycin blocks the action of Hsp90, the addition of ATP to Hsp90 complexes has been shown to

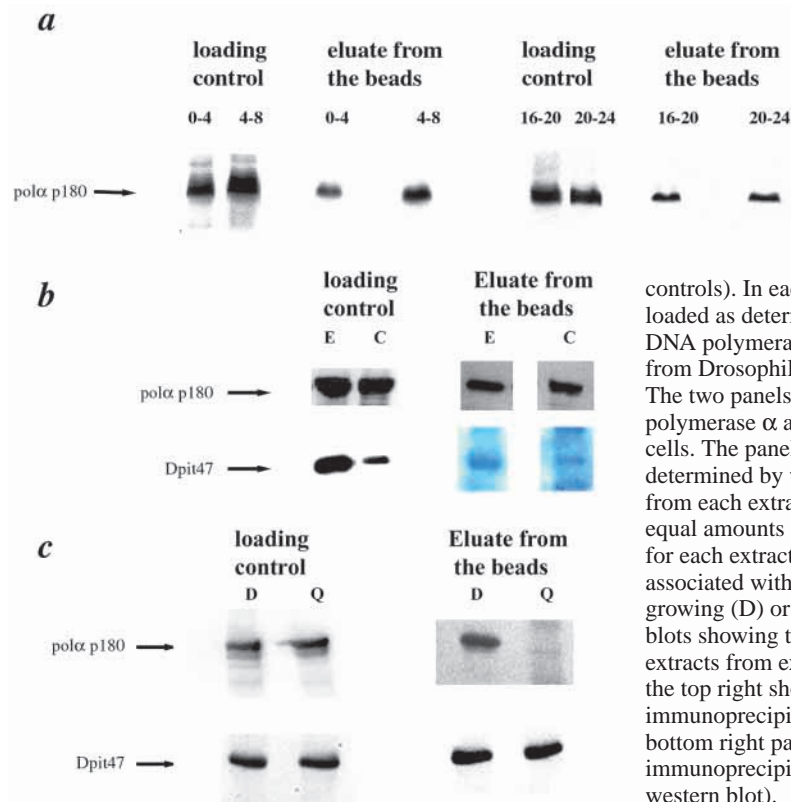

**Fig. 6.** DNA polymerase is associated with Dpit47 throughout development and in proliferating cell culture but not in quiescent cells. (a) A comparison of the amount of DNA polymerase  $\alpha$  associated with Dpit47 complexes immunoprecipitated at different stages of the life cycle from 0 to 24 hours as indicated. The amounts of DNA polymerase  $\alpha$  in each extract is indicated (loading controls). In each case equal amounts of the immunoprecipitated Dpit47 was loaded as determined by western blotting. (b) A comparison of the amount of DNA polymerase  $\alpha$  associated with Dpit47 complexes immunoprecipitated from *Drosophila* embryo extract (E) and exponentially growing S2 cells (C). The two panels on the left are western blots showing the amounts of DNA polymerase  $\alpha$  and Dpit47 in crude extracts from *Drosophila* embryos and S2 cells. The panel on the top right shows the amount of DNA polymerase  $\alpha$  (as determined by western blot) immunoprecipitated with anti-Dpit47 antibody from each extract. The bottom right panel has been included to show that equal amounts of Dpit47 (as analysed by coomassie staining) were analysed for each extract. (c) A comparison of the amount of DNA polymerase  $\alpha$  associated with Dpit47 complexes immunoprecipitated from exponentially growing (D) or quiescent (Q) S2 cells. The two panels on the left are western blots showing the amounts of DNA polymerase  $\alpha$  and Dpit47 in crude extracts from exponentially growing cells and quiescent cells. The panel on the top right shows the amount of DNA polymerase  $\alpha$  (western blot) immunoprecipitated with anti-Dpit47 antibody for each extract. As above the bottom right panel has been included to show that equal amounts of Dpit47 immunoprecipitate have been compared for each cell type (in this case by western blot).

catalyse release of the substrate. Fig. 4A,b shows that the replacement of geldanamycin with ATP reduced the DNA polymerase  $\alpha$  level below detection levels. This is also consistent with what we would expect for the interaction of an Hsp90 complex with DNA polymerase  $\alpha$ .

We therefore conclude that the appearance of Hsp90 in DNA polymerase  $\alpha$  immunoprecipitates, plus the observed effects of geldanamycin and ATP on the interaction of DNA polymerase  $\alpha$  with Dpit47, are consistent with what would be expected if Hsp90 acted as a chaperone for DNA polymerase  $\alpha$  and if Dpit47 was a co-chaperone that mediated this interaction.

### Geldanamycin affects the interaction of Dpit47 with Hsp70

The specific interaction with DNA polymerase  $\alpha$  only represents a small percentage of the Dpit47 in the cell. We were therefore interested to determine the effect of geldanamycin in general on the interaction of Dpit47 with other components of the Hsp90 pathway.

We looked at the relative amounts of Hsp90 and Hsp70 immunoprecipitated in the pellets under the various conditions (Fig. 4B). In the control immunoprecipitation Hsp90 and Hsp70 can clearly be identified. When the immunoprecipitation is performed in the presence of geldanamycin, Hsp90 and Hsp 70 are pulled down in similar amounts as in the control. In the presence of ATP, similar amounts of Hsp90 are detected but the level of Hsp70 is much reduced. These results further support the involvement of Dpit47 in the Hsp90 pathway.

### Dpit47 developmental profile

To determine the cellular function of the interaction between Dpit47 and DNA polymerase  $\alpha$  we needed to get more information about the behaviour of the Dpit47 protein in *Drosophila*. Total crude extracts from all stages of *Drosophila* life cycle were analysed on western blot with antibody directed against Dpit47. Fig. 5 shows the profile consistently obtained with Dpit47 antibodies. The protein is more abundant in young embryos, in pupae and in females and lower in late embryos, larvae and males. This pattern is characteristic of a protein having a role in proliferation.

**Fig. 7.** Subcellular and cell cycle distribution of Dpit47. (a) Confocal micrographs of Dpit47 stained embryos that have been counterstained with anti- $\alpha$  tubulin monoclonal antibodies. (b) Confocal micrographs of Dpit47 stained embryos which have been counterstained with anti-histone monoclonal antibodies. In the merged images in each case the Dpit47 is green whereas the counterstain is red. Stages of the cell cycle are indicated to the left of the panels.

### DNA polymerase $\alpha$ interacts with Dpit47 at all stages of the life cycle in *Drosophila* and in cell cultures

The interaction between DNA polymerase  $\alpha$  and Dpit47 that we have detected so far was in total cell extracts obtained from *Drosophila* embryos aged between 0 and 5 hours. In such extracts the amount of proteins provided by maternal input is still very high, especially for those proteins involved in proliferation. To determine if the interaction between DNA polymerase  $\alpha$  and Dpit47 was limited to embryos and was provided by maternal input we analysed the Dpit47:DNA polymerase  $\alpha$  interaction in conditions where the maternal input is considerably reduced (older embryos) or where there is no maternal input (cell culture). Fig. 6 shows the results of such an analysis. For Fig. 6a we made whole cell extracts from embryos up to 24 hours old (larval stage), and carried out immunoprecipitations using the anti-Dpit47 antibody, in the same conditions as above. In all cases the interaction between DNA polymerase  $\alpha$  and Dpit47 is detected at a comparable level. Similarly, we made whole cell extracts from a *Drosophila* cell line S2. Cells were collected in exponentially growing phase and homogenised as indicated in materials and methods. In this case

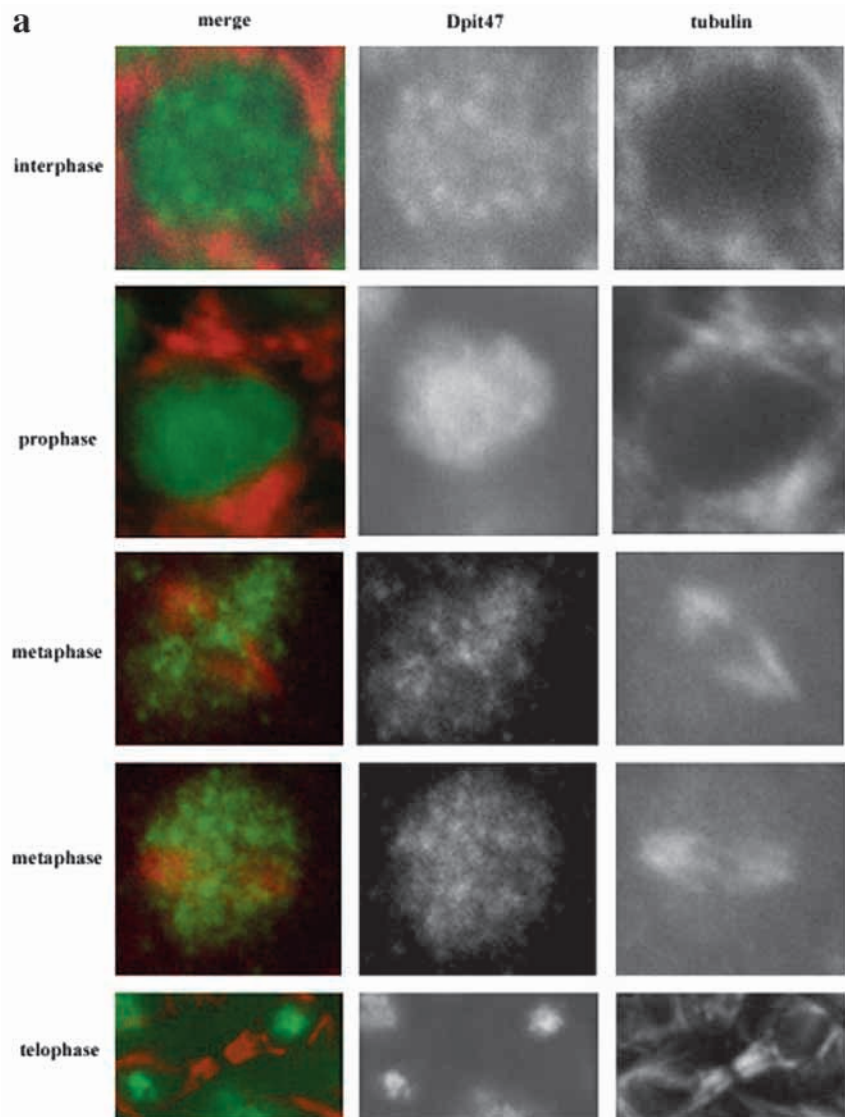

the interaction between Dpit47 and DNA polymerase  $\alpha$  was also detected to a similar level (Fig. 6b). In all cases the interactions showed the same elution characteristics (data not shown).

From these results we can conclude that the interaction between DNA polymerase  $\alpha$  and Dpit47 is not limited to young embryos but also takes place in older embryos and in cell culture.

### The interaction between DNA polymerase $\alpha$ and Dpit47 is not detected in non-proliferating cells

We next investigated whether the Dpit47:DNA polymerase  $\alpha$  interaction also occurred in non-proliferating cells. We made whole cell extracts from quiescent S2 cells and carried out immunoprecipitation using the anti-Dpit47 antibody. As a positive control we used proliferating S2 cells as above. Fig. 6c compares the level of DNA polymerase  $\alpha$  in equivalent amounts of Dpit47 immunoprecipitates from exponentially growing and quiescent cells and shows that in quiescent cells the amount of DNA polymerase  $\alpha$  is very much reduced. This is not due to the absence of DNA polymerase  $\alpha$  as it is also detected in quiescent cells (Fig. 6c, loading control).

From this result we can conclude that the interaction between Dpit47 and DNA polymerase  $\alpha$  is confined to proliferating cells and therefore, as was originally suggested by the expression profile of the Dpit47, the interaction is likely to have some role in proliferation.

### Dpit47 is found in the nucleus but is only loosely associated with the chromatin

Much of the activity of Hsp90 co-chaperones takes place in the cytoplasm. We therefore determined the cellular location of Dpit47 as a guide to where it was likely to carry out its function.

In embryos prior to cellularisation where the protein was most abundant, Dpit47 protein was visible throughout the embryo in the nucleus and cytoplasm (data not shown). After cellularisation, however, the protein was seen predominantly in the nucleus. Fig. 7a shows the staining pattern using affinity purified Dpit47 antibodies and counterstained with anti-tubulin antibodies to clearly visualise the stages of the cell cycle. Throughout the cell cycle – even during mitosis when the nuclear envelope has partially broken down – Dpit47 staining appears to be confined within the nuclear region. In Fig. 7b

where the embryos are counterstained with histone it is apparent that the Dpit47 staining only partially overlaps that of the DNA in interphase and telophase and in the mitotic stages forms a cloud in the vicinity of, but not directly associated with, the DNA. In both Fig. 7a and Fig. 7b it is possible to see that two different patterns are obtained for Dpit47 staining in mitosis. In the upper of the two metaphase panels in each case the protein appears more proximal to the DNA than the other. Although both these patterns are visible regularly we have not been able to determine definitively which of them precedes the other in the cell cycle.

To confirm the cellular location of Dpit47 using another method we performed cellular fractionation of embryos and *Drosophila* S2 cells. The initial fractionation was between cytoplasm and nucleus. The nuclear pellet was further fractionated into the nucleoplasm and chromatin associated protein by non-ionic detergent treatment. Increasingly stringent salt washes were then used to release proteins binding to the nuclear pellet with different affinities. The biochemical analysis of the S2 cells is shown in Fig. 8. About 50% of the Dpit47 is seen in the cytoplasmic fractions. This most likely represents leakage from the nuclear area, particularly during mitosis when the nuclear envelope is not intact. On further fractionation it can be seen that Dpit47 is released totally from the nucleus by triton treatment and is not detected in the chromatin-associated fractions. By comparison, the DNA polymerase  $\alpha$  is found to be much more tightly associated with the nucleus. The fractionation pattern from

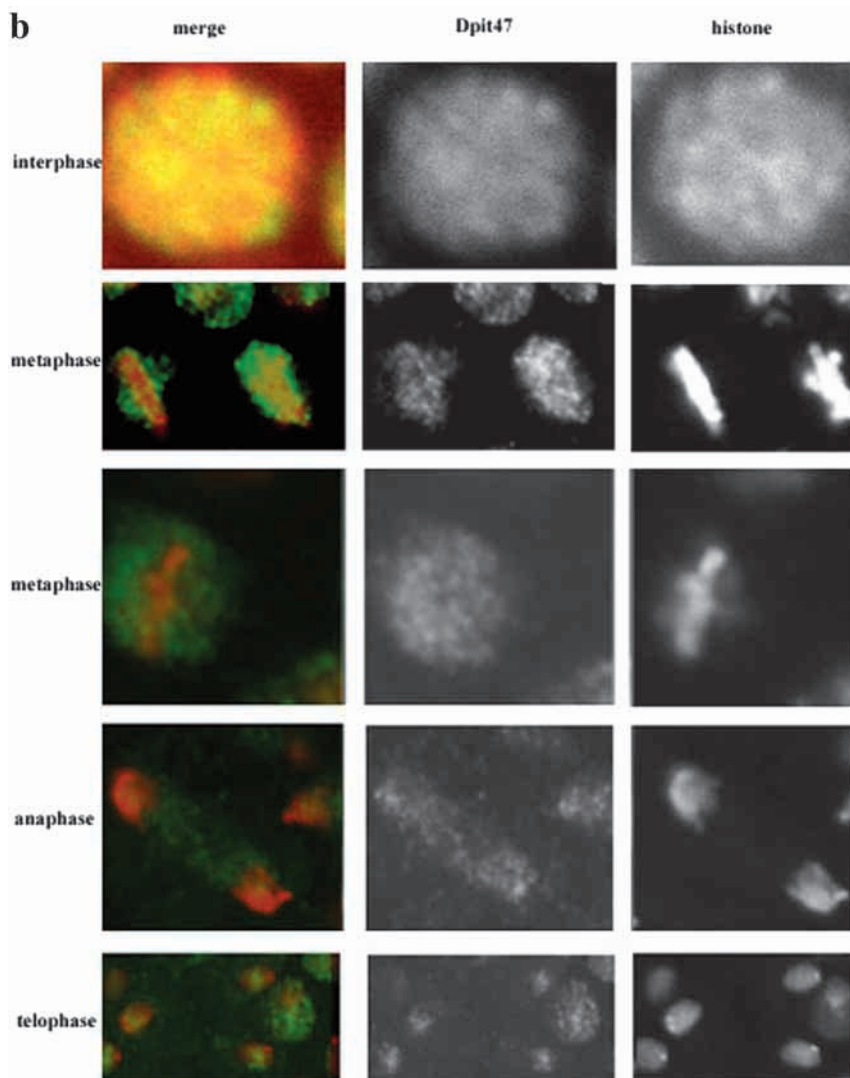

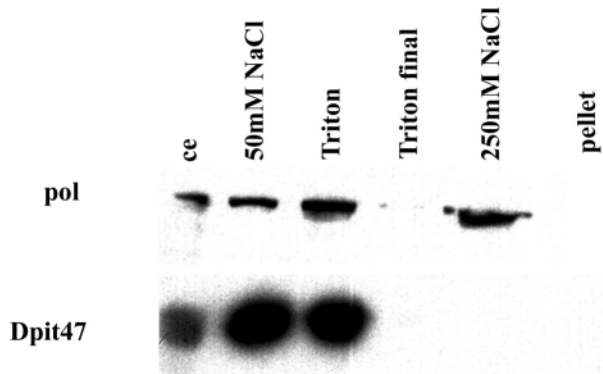

**Fig. 8.** Cellular fractionation of Dpit47 and DNA polymerase  $\alpha$ . *Drosophila* embryo extracts were subjected to salt and detergent fractionation and analysed by western blot using anti Dpit47 and anti-DNA polymerase (pol) antibodies as described in Materials and Methods. Ce, total cellular extract as a control; 50 mM NaCl, cytoplasmic fraction; Triton, protein released on treatment of nucleus with triton, representing the nucleoplasmic fraction; Triton final, last triton wash before salt extractions to show that there is no carry over between fractions; 250 mM NaCl, Triton pellet extracted with 250 mM NaCl and 1% Triton; pellet, remainder after all extractions.

embryos is largely similar (data not shown), except that a slightly higher percentage of the Dpit47 was found in the cytoplasm, probably due to maternal input in early embryos.

The cellular fractionation results are therefore consistent with the data obtained from immunofluorescence and suggest that the bulk of the Dpit47 is located in the nucleoplasm but is not tightly associated with the chromatin.

### The interaction between Dpit47 and DNA polymerase $\alpha$ is detected both in cytoplasmic and nucleoplasmic fractions

Because Dpit47 is detected in the cytoplasm and the nucleoplasm we were interested to determine whether the interaction that we had observed with DNA polymerase  $\alpha$  was also detected in both compartments. Immunoprecipitations were therefore performed on cytoplasmic and their corresponding nucleoplasmic fractions from embryos 0-18

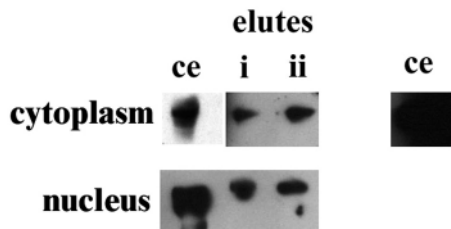

**Fig. 9.** Analysis of Dpit47 DNA polymerase complexes in the cytoplasm and in the nucleoplasm. Cytoplasmic and nucleoplasmic fraction were subjected to immunoprecipitations using anti-Dpit47 antibody. The DNA polymerase eluted in 250 mM NaCl from two separate experiments fractions was determined by western blots using anti-DNA polymerase antibody. For the cytoplasmic fraction (top panel) the lane ce on the left corresponds to shorter exposure time in order to visualise the band. The same exposure time as the eluted fractions is shown on the right. i and ii, two separate elutions; ce, crude extract control.

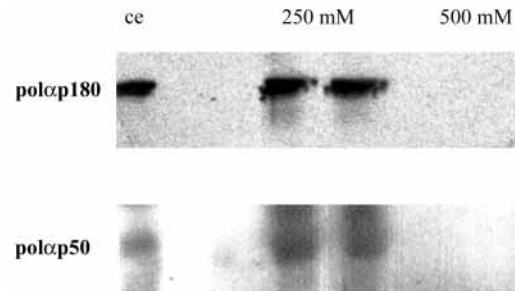

**Fig. 10.** The primase subunit p50 is detected in the complex immunoprecipitated by anti-Dpit47 antibody. Dpit47 immunoprecipitates as described in Materials and Methods were analysed using anti-p180 (pol $\alpha$ p180) and anti-p50 (pol $\alpha$ p50) antibodies. In each case two separate experiments are shown. The lane after the ce contains the last wash of the immunoprecipitate prior to elution to show that there is no carryover between fractions. 250 mM and 500 mM, the 250 mM and 500 mM NaCl elutions from the immunoprecipitate, respectively; ce, crude extract as a control.

hours old and analysed as described above. As shown in Fig. 9 the interaction between DNA polymerase  $\alpha$  and Dpit47 is detected in both fractions. By comparison of the amount of DNA polymerase  $\alpha$  present in the precipitate and in the crude cytoplasmic and nucleoplasmic fractions, it is possible to see that significantly more p180 is found associated with Dpit47 in the nucleoplasmic than in the cytoplasmic fraction.

### Other subunits of DNA polymerase $\alpha$ are detected in the eluates

DNA polymerase  $\alpha$  is a multisubunit enzyme and therefore one possible function of the interaction with Dpit47 is related to the assembly of the complex. If this was the case we would expect that immunoprecipitates of Dpit47 would contain substoichiometric amounts of the other polymerase subunits. Fractions in which the 180 kDa subunit of the DNA polymerase  $\alpha$  was detected in Dpit47 immunoprecipitates were therefore analysed by western blotting for the presence of the other subunits. Fig. 10 shows that the primase subunit p50 was also present in the precipitates and eluted with the same profile as the polymerase subunit. Calculation of the amount of the primase present suggested that the levels of the two proteins were also present in similar amounts. Similar results were obtained for the 73kDa subunit (data not shown).

In view of this result and because of the very strong interaction between the p50 and p60 subunits and the p180 and p73 subunits, it seems likely that the interaction detected is between Dpit47 and the whole DNA polymerase  $\alpha$  enzyme, and makes it less likely that the interaction is involved in the assembly of the polymerase complex.

### The DNA polymerase $\alpha$ associated with Dpit47 is inactive

We also wished to determine whether the association between Dpit47 and DNA polymerase  $\alpha$  had any effect on its enzymatic activity. We therefore looked at the ability of the DNA polymerase  $\alpha$  co-immunoprecipitated with Dpit47 to perform an end filling reaction on a 35 mer substrate. As a control we immunoprecipitated DNA polymerase  $\alpha$  with a monoclonal antibody known not to affect its activity. The levels of



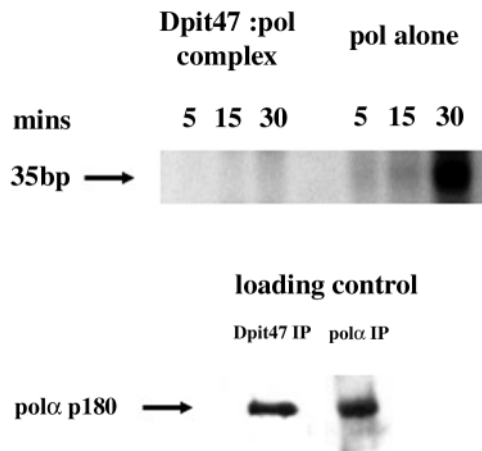

**Fig. 11.** The DNA polymerase  $\alpha$  complexed with Dpit47 is inactive. DNA polymerase  $\alpha$  was immunoprecipitated using anti-Dpit47 antibody or monoclonal anti-DNA polymerase  $\alpha$  antibody. Top panel, DNA polymerase assay: immunoprecipitated DNA polymerase  $\alpha$  was used to carry out an end filling polymerase assay on a 35 mer as described in Materials and Methods. The reaction was stopped after 5, 15 or 30 minutes. The product of the reaction was analysed on a 15% polyacrylamide gel. Lower panel shows by western blotting the amount of DNA polymerase  $\alpha$  contained in the Dpit47 (Dpit47 IP) and DNA polymerase  $\alpha$  (pol $\alpha$  IP) immunoprecipitates used in the assay.

polymerase were adjusted to be equivalent in both cases (Fig. 11, loading control). Fig. 11 clearly demonstrates that the DNA polymerase associated with Dpit47 has no detectable polymerase activity. This is not due to an inhibitory protein present in the Dpit47 immunoprecipitates as addition of Dpit47 precipitates has no effect on the level of polymerase activity detected in the DNA polymerase immunoprecipitates (data not shown).

## DISCUSSION

### Dpit47 is an Hsp90 interacting protein

We have identified the *Drosophila* Dpit47 protein as a novel Hsp90 co-chaperone protein that interacts with the DNA polymerase  $\alpha$ . Like other Hsp90 co-chaperone proteins, Dpit47 possesses a TPR domain. TPR domains are found in a wide variety of proteins and are thought to be involved in protein:protein interactions. In the Hsp90 co-activators they are thought to be involved in the interaction with Hsp90 (Scheufler et al., 2000), and the co-chaperone TPR domains form a distinct subset of TPR motif containing proteins that are more closely related to each other than to other TPR proteins, e.g. the APC proteins. Quite a large number of proteins have now been identified as Hsp90 co-chaperones; however, this blanket term covers a number of different subgroups. A more detailed analysis of the sequence of Dpit47 suggests that it falls into that class of co-chaperones that contains proteins such as Hop. These are thought to be involved in the early part of the reaction, and in recognition of the client proteins, although how closely these proteins are related to each other functionally and whether they also possess other biochemical activities remains to be determined. Our suggestion of a co-chaperone role for

Dpit47 is strengthened by our isolation of tight and stoichiometric complex of Dpit47 with Hsp90 in extracts, and further supported by the observed interaction between Dpit47 and Hsp70, another protein which has been shown to act in the Hsp90 pathway. The isolation of a complex containing only these two proteins, the relative levels of the Hsp90 and 70 in the complex and the effects of the addition of ATP or the specific Hsp90 inhibitor geldanamycin on these interactions is also consistent with Dpit47 being involved in the early stages of the Hsp90 pathway.

The recent release of the *Drosophila* genome sequence (Adams et al., 2000) has further allowed us to determine that Dpit47 is a member of a family of proteins in *Drosophila*. Seven other homologues can be identified from their genome sequence, although in most cases the homology is largely confined to the TPR region. One of these proteins has already been defined as the *Drosophila* Hop homologue; the others are as yet uncharacterised.

Database searching has also allowed us to identify Dpit47 homologues in other species from budding yeast to mammals. The closest of these is a human protein TTC4 (accession number NM\_004623.1), which was first identified as a putative tumour suppressor gene frequently deleted in breast cancer (Su et al., 1999). Since this is closely related to Dpit47 it would be interesting to determine if TTC4 has retained functional characteristics of the Dpit47 protein.

### Dpit47 is likely to function as a DNA polymerase $\alpha$ co-chaperone

Most of the work presented here centres around the study of the interaction of the Dpit47 protein with the DNA polymerase  $\alpha$ . Although the interaction was first seen in the two hybrid system, we have also confirmed that the interaction can be detected in extracts from various types of cells. We have detected the interaction in both cytoplasmic and nucleoplasmic fractions, suggesting the interaction may occur in both compartments. However, we cannot completely rule out the possibility that Dpit47 associates with DNA polymerase  $\alpha$  predominantly in the nucleoplasmic fraction, and that the interactions observed in cytoplasmic fractions are caused by leakage from the nucleus during the nuclear preparation, particularly from cells in mitosis.

Although both proteins are quite abundant, the interaction only involves about 10-20% of the polymerase and 1-2% of the Dpit47. This is consistent with the Dpit47 having other substrates (see later). For the DNA polymerase  $\alpha$  this could represent an instability of the complex to the isolation conditions, alternatively only a subpopulation of the DNA polymerase  $\alpha$  molecules may bind to Dpit47.

In addition to showing the interaction between Dpit47 and DNA polymerase  $\alpha$ , we have also been able to immunoprecipitate Hsp90 directly with DNA polymerase  $\alpha$  antibodies. Although we have not formally isolated the trimeric complex, this observation, taken together with the observed effect of geldanamycin on the Dpit47:polymerase interaction, strongly suggests that the DNA polymerase  $\alpha$ :Dpit47 complex is likely to also include Hsp90.

### Cellular function of Dpit47: DNA polymerase $\alpha$ interaction

Our data is suggestive of a role for the Hsp90 pathway in

DNA polymerase  $\alpha$  function. Interestingly, it is also consistent with a much earlier report in which geldanamycin was shown to inhibit DNA polymerase  $\alpha$  activity (Yamaki et al., 1982). However, an important question is the function of this interaction in a cellular context. Among Hsp90 client proteins the purpose of the interaction with Hsp90 varies depending on the protein concerned. For a large group of proteins, including the widely studied glucocorticoid receptor (Buchner, 1999) and telomerase, it seems that the interaction is involved in the conversion of the protein from the inactive to the active state. For other proteins it is involved in holding the protein in a particular configuration so that it can interact with protein partners or be modified in some way (e.g. phosphorylated). The interaction with the DNA polymerase that we have studied here causes a severe inhibition of the polymerase activity in the complex (the specific activity is at least 50x less than that normally seen). This suggests that the most likely role of the interaction in this case is to sequester polymerase in an inactive form. What still remains to be determined is the role this plays in the normal functioning of the cell. It is likely to be involved in proliferation, as the interaction does not occur in quiescent cells. The presence of the interaction in late embryos/larvae and cell culture also suggests that it is not just related to the unusual situation in early embryos in *Drosophila* where excessive amounts of maternal proteins are present.

In the normal progression of the cell cycle there are a number of places where such an activity could be useful. Inactive polymerase must be maintained prior to initiation of DNA replication, or after the completion of one complete round, therefore Dpit47 could function at either of these stages. Because the observed location of Dpit47 is predominantly nucleoplasmic but not chromatin bound, any observed effect must take place prior to or subsequent to the association of the polymerase with the replication complex, rather than actually in the complex itself. Therefore, Dpit47 could function by facilitating rapid binding of the polymerase to the chromatin during initiation of DNA replication by concentrating the polymerase in an inactive form close to its potential substrate. Alternatively, it could function by allowing rapid sequestration of the polymerase after it has finished synthesis.

A sequestration role for the Dpit47 DNA polymerase  $\alpha$  interaction does not preclude the possibility that the interaction may have other additional effects on the polymerase that are more in line with the effects that the Hsp90 pathway has been seen to have on other client proteins. We cannot rule out completely that passage through the Hsp90 complex is required for activation of all polymerase molecules (as for the glucocorticoid receptor). However, the high level of activity of the polymerase isolated from early embryos when only small amounts need to have been activated owing to the small number of genomes to replicate, and the observation that polymerases from other organisms can be overproduced and are active, makes it less likely.

Equally, the observation that the Dpit47 immunoprecipitates contain all four subunits in equal amounts makes it unlikely that interaction is required for the assembly of the complex. However, it is still possible that the Dpit47 interaction is required for modification of the polymerase, or for allowing its interaction with other components of the replication complex.

### Cellular function of Dpit47

Hsp90 is an essential abundant molecular chaperone involved in the folding, assembly and activation of number of proteins involved in signal transduction, cell cycle control, telomerase activity Hsp90 (Holt et al., 1999) or transcriptional regulation (Pratt, 1998). Here we have presented evidence that links the Hsp90 pathway with a mainstream replication protein, thereby providing the first report of a possible role for chaperones in the process of DNA replication in higher eukaryotes. However, the amount of Dpit47 is far greater than that of DNA polymerase  $\alpha$ , making it very likely that Dpit47 has other client partners. Sensitive Coomassie analysis of the fractions where DNA polymerase  $\alpha$  is detected eluting from the anti-Dpit47 antibody reveal the presence of about a dozen bands of comparable intensity to DNA polymerase  $\alpha$ . It would therefore be interesting to identify these proteins to determine if any others are involved in DNA replication and to see what other cellular processes might involve Dpit47.

The authors would like to thank S. Kearsy and C. Donaghue for critical reading of the manuscript, and M. Arbeitman for communicating results prior to publication. Thanks also to C. Prodomou, I. R. Lehman and K. Kuroda for antibodies and R. Brent for two hybrid libraries. This work was supported by a grant from the AICR and Marie Curie Cancer Care.

### REFERENCES

- Adams, M. D., Celniker, S. E., Holt, R. A., Evans, C. A., Gocayne, J. D., Amanatides, P. G., Scherer, S. E., Li, P. W., Hoskins, R. A., Galle, R. F. et al. (2000). The genome sequence of *Drosophila melanogaster*. *Science* **287**, 2185-2195.
- Ashburner, M. (1989). In *Drosophila: a laboratory manual* (Vol. 2), Cold Spring Harbor Laboratory Press.
- Bakkenist, C. J. and Cotterill, S. (1994). The 50-kDa primase subunit of *Drosophila melanogaster* DNA polymerase alpha. Molecular characterization of the gene and functional analysis of the overexpressed protein. *J. Biol. Chem.* **269**, 26759-26766.
- Bouvier, D., De Recondo, A. M. and Baldacci, G. (1993). In vivo phosphorylation, mitotic behavior, and nuclear binding of the catalytic subunit of DNA polymerase alpha in fission yeast. *Exp. Cell Res.* **207**, 41-47.
- Buchner, J. (1999). Hsp90 & Co. – a holding for folding. *Trends Biochem. Sci.* **24**, 136-141.
- Campbell, K. S., Mullane, K. P., Aksoy, I. A., Stubdal, H., Zalvide, J., Pipas, J. M., Silver, P. A., Roberts, T. M., Schaffhausen, B. S. and DeCaprio, J. A. (1997). DnaJ/hsp40 chaperone domain of SV40 large T antigen promotes efficient viral DNA replication. *Genes Dev.* **11**, 1098-1110.
- Copeland, W. C. and Wang, T. S. (1993). Enzymatic characterization of the individual mammalian primase subunits reveals a biphasic mechanism for initiation of DNA replication. *J. Biol. Chem.* **268**, 26179-26189.
- Cotterill, S., Lehman, I. R. and McLachlan, P. (1992). Cloning of the gene for the 73 kD subunit of the DNA polymerase alpha primase of *Drosophila melanogaster*. *Nucleic Acids Res.* **20**, 4325-4330.
- Desdouets, C., Santocanale, C., Drury, L. S., Perkins, G., Foiani, M., Plevani, P. and Diffley, J. F. (1998). Evidence for a Cdc6p-independent mitotic resetting event involving DNA polymerase alpha. *EMBO J.* **17**, 4139-4146.
- Dolinski, K. J., Cardenas, M. E. and Heitman, J. (1998). CNS1 encodes an essential p60/Sti1 homolog in *Saccharomyces cerevisiae* that suppresses cyclophilin 40 mutations and interacts with Hsp90. *Mol. Cell Biol.* **18**, 7344-7352.
- Duronio, R. J., O'Farrell, P. H., Xie, J. E., Brook, A. and Dyson, N. (1995). The transcription factor E2F is required for S phase during *Drosophila* embryogenesis. *Genes Dev.* **9**, 1445-1455.
- Falconi, M. M., Piseri, A., Ferrari, M., Lucchini, G., Plevani, P. and Foiani, M. (1993). De novo synthesis of budding yeast DNA polymerase alpha and

- POL1 transcription at the G1/S boundary are not required for entrance into S phase. *Proc. Natl. Acad. Sci. USA* **90**, 10519-10523. [published erratum appears in *Proc. Natl. Acad. Sci. USA* (1994) **91**,1598.]
- Foiani, M., Liberi, G., Lucchini, G. and Plevani, P.** (1995). Cell cycle-dependent phosphorylation and dephosphorylation of the yeast DNA polymerase alpha-primase B subunit. *Mol. Cell Biol.* **15**, 883-891.
- Foiani, M., Lucchini, G. and Plevani, P.** (1997). The DNA polymerase alpha-primase complex couples DNA replication, cell-cycle progression and DNA-damage response. *Trends Biochem. Sci.* **22**, 424-427.
- Gyuris, J., Golemis, E., Chertkov, H. and Brent, R.** (1993). Cdi1, a human G1 and S phase protein phosphatase that associates with Cdk2. *Cell* **75**, 791-803.
- Harlow, E. and Lane, D.** (1988). In *Antibodies: A laboratory manual*, Cold Spring Harbor Laboratory Press.
- Holt, S. E., Aisner, D. L., Baur, J., Tesmer, V. M., Dy, M., Ouellette, M., Trager, J. B., Morin, G. B., Toft, D. O., Shay, J. W. et al.** (1999). Functional requirement of p23 and Hsp90 in telomerase complexes. *Genes Dev.* **13**, 817-826.
- Hubscher, U., Nasheuer, H. P. and Syvaoja, J. E.** (2000). Eukaryotic DNA polymerases, a growing family. *Trends Biochem. Sci.* **25**, 143-147.
- Huikeshoven, H. and Cotterill, S.** (1999). Cloning and characterisation of the gene for the large subunit of the DNA primase from *Drosophila melanogaster*. *Biochim. Biophys. Acta* **1445**, 359-362.
- Koniczny, I. and Zylicz, M.** (1999). Role of bacterial chaperones in DNA replication. *Genet. Eng.* **21**, 95-111.
- Kuroda, K. and Ueda, R.** (1999). Phosphorylation and dephosphorylation of the B subunit of DNA polymerase alpha-primase complex in the early embryogenesis of *Drosophila*. *Biochem. Biophys. Res. Commun.* **254**, 372-377.
- Lamb, J. R., Tugendreich, S. and Hieter, P.** (1995). Tetratricopeptide repeat interactions: to TPR or not to TPR? *Trends Biochem. Sci.* **20**, 257-259.
- Liu, J. S., Kuo, S. R., Makhov, A. M., Cyr, D. M., Griffith, J. D., Broker, T. R. and Chow, L. T.** (1998). Human Hsp70 and Hsp40 chaperone proteins facilitate human papillomavirus-11 E1 protein binding to the origin and stimulate cell-free DNA replication. *J. Biol. Chem.* **273**, 30704-30712.
- Mahony, D., Parry, D. A. and Lees, E.** (1998). Active cdk6 complexes are predominantly nuclear and represent only a minority of the cdk6 in T cells. *Oncogene* **16**, 603-611.
- Marsh, J. A., Kalton, H. M. and Gaber, R. F.** (1998). Cns1 is an essential protein associated with the hsp90 chaperone complex in *Saccharomyces cerevisiae* that can restore cyclophilin 40-dependent functions in cpr7Delta cells. *Mol. Cell Biol.* **18**, 7353-7359.
- Mathe, E., Bates, H., Huikeshoven, H., Deak, P., Glover, D. M. and Cotterill, S.** (2000). Importin-alpha3 is required at multiple stages of *Drosophila* development and has a role in the completion of oogenesis. *Dev. Biol.* **223**, 307-322.
- Melov, S., Vaughan, H. and Cotterill, S.** (1992). Molecular characterisation of the gene for the 180 kDa subunit of the DNA polymerase-primase of *Drosophila melanogaster*. *J. Cell Sci.* **102**, 847-856.
- Nasheuer, H. P. and Grosse, F.** (1988). DNA polymerase alpha-primase from calf thymus. Determination of the polypeptide responsible for primase activity. *J. Biol. Chem.* **263**, 8981-8988.
- Parsell, D. A. and Lindquist, S.** (1993). The function of heat-shock proteins in stress tolerance: degradation and reactivation of damaged proteins. *Annu. Rev. Genet.* **27**, 437-496.
- Pearl, L. H. and Prodromou, C.** (2000). Structure and in vivo function of Hsp90. *Curr. Opin. Struct. Biol.* **10**, 46-51.
- Pratt, W. B.** (1998). The hsp90-based chaperone system: involvement in signal transduction from a variety of hormone and growth factor receptors. *Proc. Soc. Exp. Biol. Med.* **217**, 420-434.
- Santocanale, C., Foiani, M., Lucchini, G. and Plevani, P.** (1993). The isolated 48,000-dalton subunit of yeast DNA primase is sufficient for RNA primer synthesis. *J. Biol. Chem.* **268**, 1343-1348.
- Scheufler, C., Brinker, A., Bourenkov, G., Pegoraro, S., Moroder, L., Bartunik, H., Hartl, F. U. and Moarefi, I.** (2000). Structure of TPR domain-peptide complexes: critical elements in the assembly of the Hsp70-Hsp90 multichaperone machine. *Cell* **101**, 199-210.
- Stokke, T., Erikstein, B., Holte, H., Funderud, S. and Steen, H. B.** (1991). Cell cycle-specific expression and nuclear binding of DNA polymerase alpha. *Mol. Cell Biol.* **11**, 3384-3389.
- Su, G., Roberts, T. and Cowell, J. K.** (1999). TTC4, a novel human gene containing the tetratricopeptide repeat and mapping to the region of chromosome 1p31 that is frequently deleted in sporadic breast cancer. *Genomics* **55**, 157-163.
- Voitenleitner, C., Rehfuess, C., Hilmes, M., O'Rear, L., Liao, P. C., Gage, D. A., Ott, R., Nasheuer, H. P. and Fanning, E.** (1999). Cell cycle-dependent regulation of human DNA polymerase alpha-primase activity by phosphorylation. *Mol. Cell Biol.* **19**, 646-656.
- Weinreich, M. and Stillman, B.** (1999). Cdc7p-Dbf4p kinase binds to chromatin during S phase and is regulated by both the APC and the RAD53 checkpoint pathway. *EMBO J.* **18**, 5334-5346.
- Xu, Y., Singer, M. A. and Lindquist, S.** (1999). Maturation of the tyrosine kinase c-src as a kinase and as a substrate depends on the molecular chaperone Hsp90. *Proc. Natl. Acad. Sci. USA* **96**, 109-114.
- Yamaguchi, M., Hayashi, Y., Nishimoto, Y., Hirose, F. and Matsukage, A.** (1995). A nucleotide sequence essential for the function of DRE, a common promoter element for *Drosophila* DNA replication-related genes. *J. Biol. Chem.* **270**, 15808-15814.
- Yamaki, H., Suzuki, H., Choi, E. C. and Tanaka, N.** (1982). Inhibition of DNA synthesis in murine tumor cells by geldanamycin, an antibiotic of the benzoquinoid ansamycin group. *J. Antibiot.* **35**, 886-892.
- Zervos, A. S., Gyuris, J. and Brent, R.** (1993). Mxi1, a protein that specifically interacts with Max to bind Myc-Max recognition sites. *Cell* **72**, 223-232. [published erratum appears in *Cell* (1994) **79**, following 388].
